# Supplementary material
Source: PubMed Central journal article supplement (PMC1698902)
Supplement: 7601457s1.pdf [file 7601457s1.pdf]

## Supplementary Figure 1.

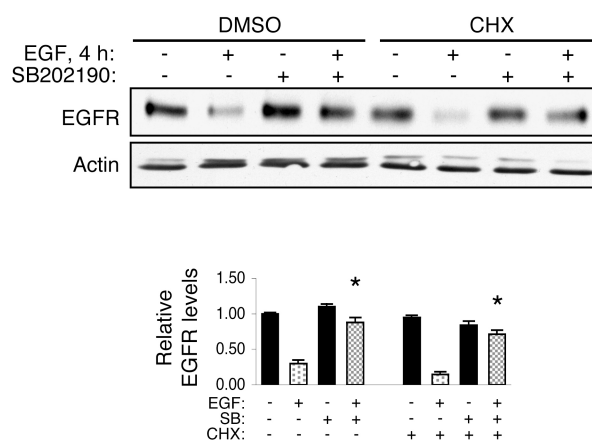

**Supplementary Figure 1. p38 inhibition does not affect EGFR synthesis rates.** To distinguish between a p38 effect on new receptor synthesis versus signaling or degradation events, YAMC cells were exposed to EGF for 4 h in the absence or presence of SB202190 and the protein synthesis inhibitor cycloheximide (10  $\mu$ g/ml, 1 h pretreatment). Whole cell lysates were prepared and subjected to Western blot analysis for EGFR. Densitometry shows averaged results from 3 experiments. \*,  $p < 0.0001$  vs. EGF alone. Blockade of protein synthesis did not abrogate SB202190-mediated preservation from ligand-induced EGFR loss.
