# Supplementary material
Source: PubMed Central journal article supplement (PMC1698902)
Supplement: 7601457s4.pdf [file 7601457s4.pdf]

## Supplementary Figure 4.

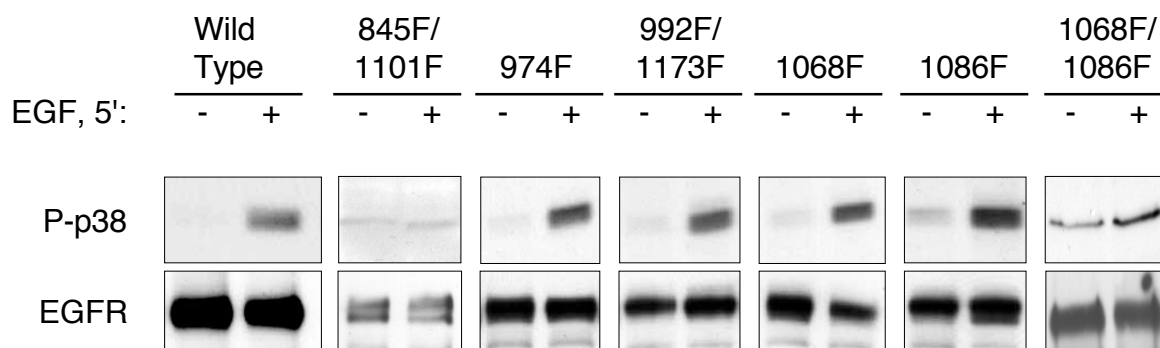

**Supplementary Figure 4. p38 activation by EGFR point mutants.** EGFR<sup>-/-</sup> MCE cells transfected with indicated Y>F EGFR mutants were exposed to EGF (10 ng/ml) for 5 min. Whole cell lysates were prepared and subjected to Western blot analysis for EGFR levels and phospho (active)-p38. Only an EGFR construct harboring mutations in the Src target sites Y845/Y1101 was deficient in p38 activation.
