# Supplementary material
Source: PubMed Central journal article supplement (PMC1698902)
Supplement: 7601457s5.pdf [file 7601457s5.pdf]

## Supplementary Figure 5.

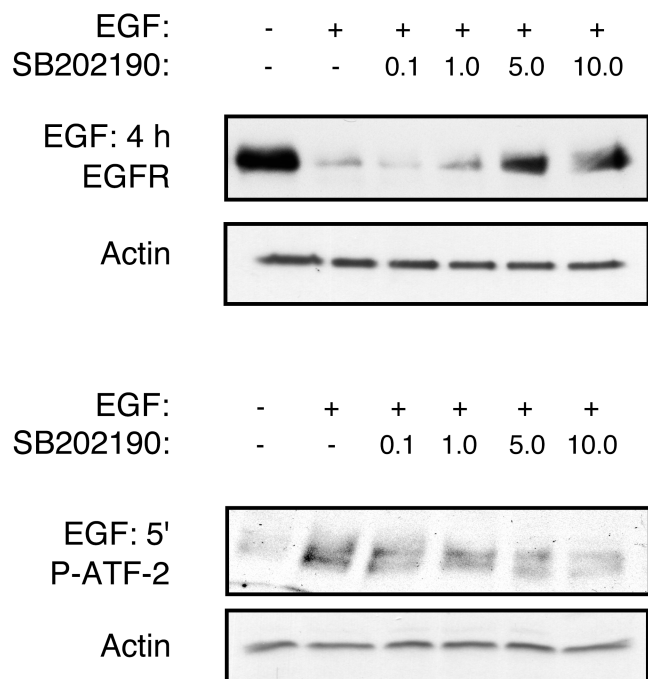

**Supplementary Figure 5. SB202190 concentration curve.** YAMC cells were pretreated for 30 min with SB202190 at 0.1, 1, 5, or 10  $\mu\text{M}$ , then exposed to 10 ng/ml EGF for 4 h (top two panels) or 5 min (lower two panels). SB202190 remained in the cultures throughout the EGF treatment. Whole cell lysates were collected and subjected to SDS-PAGE and Western blot analysis for EGFR levels and phosphorylation of the p38 target ATF-2. Both EGFR degradation and ATF-2 phosphorylation were blocked in a dose-dependent manner, maximally at 10  $\mu\text{M}$ .
