# Supplementary material
Source: PubMed Central journal article supplement (PMC1698902)
Supplement: 7601457s6.pdf [file 7601457s6.pdf]

## **Supplementary Information**

*Antibodies*—Mouse monoclonal anti-ubiquitin, rabbit monoclonal anti-PY-1173 EGFR, rabbit polyclonal antibodies (pAb) against p38 MAPK, phospho-p38, phospho-ATF-2, PY-845, -1045, and -1086 EGFR, and ERK MAPK, and horseradish peroxidase (HRP)-conjugated secondary antibodies were purchased from Cell Signaling Technology (Beverly, MA). Rabbit anti-PY-992 and -1068 EGFR sera were from Biosource (Camarillo, CA). Anti-Cbl pAb and 528-phycoerythrin (PE)-conjugated mouse anti-EGFR were from Santa Cruz Biotechnology (Santa Cruz, CA). Anti-active ERK pAb was obtained from Promega Corp. (Madison, WI). Anti-actin and polyclonal anti-ubiquitin were purchased from Sigma-Aldrich Corp. (St. Louis, MO). Anti-EGFR pAb was purchased from Upstate (Charlottesville, VA). HRP-conjugated mouse anti-PY (PY20) was purchased from BD Transduction Labs. Cy3- and FITC-conjugated secondary antibodies were from Jackson ImmunoResearch Labs (West Grove, PA). Mouse monoclonal anti-caveolin-1 and -EEA1 were the kind gift of Jim Goldenring (Vanderbilt University, Nashville, TN).
